# Supplementary material for: Effectiveness and safety of psychosocial interventions for the treatment of cannabis use disorder: a systematic review and meta-analysis
Source: bioRxiv or medRxiv preprint supplement (doi:10.1101/2024.11.18.24317475), 2024-11-18
Supplement: Supplementary file [file media-6.pdf]

**SUPPORTING INFORMATION 3. SEARCH STRATEGIES****Main search strategies**

**Ovid MEDLINE(R) ALL** <1946 to June 12, 2024>

- 1 Marijuana Abuse/ 7227
- 2 Marijuana Smoking/dt, th 100
- 3 ((cannabi\* or marihuana or marijuana or bhang or ganja or ganjah or hashish) adj3 (problem\* use\* or overus\* or abus\* or misus\* or dependen\* or addict\* or use\* disorder\* or overdos or craving\* or cessation\* or detox\* or withdraw\* or abstin\*)).tw,id. 6114
- 4 ((cannabi\* or marihuana or marijuana or bhang or ganja or ganjah or hashish) adj3 (high\* or heavy or freq\*) adj3 (use\* or overuse\* or risk\* or smok\*)).tw,kf. 3305
- 5 (CUD and (cannabi\* or marihuana or marijuana or bhang or ganja or ganjah or hashish)).tw,kf.716
- 6 ((substance adj2 disorder\*) and (cannabi\* or marihuana or marijuana or bhang or ganja or ganjah or hashish)).ti,kf,hw. 6925
- 7 (((relaps\* adj1 prevent\*) or maintenance) adj5 (cannabi\* or marihuana or marijuana or bhang or ganja or ganjah or hashish)).tw,kf. 94
- 8 or/1-7 17209
- 9 exp Randomized Controlled Trial/ 616616
- 10 randomized controlled trial.pt.615041
- 11 (randomi#ed or randomi#ation or randomi#ing).tw,kf. 867120
- 12 (RCT or "at random" or (random\* adj3 (administ\* or allocat\* or assign\* or class\* or cluster or crossover or cross-over or control\* or determine\* or divide\* or division or distribut\* or expose\* or fashion or number\* or place\* or pragmatic or quasi or recruit\* or split or substitut\* or treat\*))).tw,kf. 774763
- 13 Random Allocation/ 107314
- 14 randomly.ab. 435329
- 15 double-blind method/ or single-blind method/ 211424
- 16 ((single or double or triple or treble) adj2 (blind\* or mask\* or dummy)).tw,kf. 207158
- 17 trial.ti. 311159
- 18 (placebo and control\* and trial).ab,kf. 71132
- 19 (placebo adj5 (control\* or group\*)).tw,kf. 150098
- 20 or/9-19 1576036
- 21 8 and 20 1330
- 22 ((allocat\* or assign\*) and (group\* or control\*)).tw,kf. and (Marijuana Abuse/dt, th or Marijuana Smoking/dt, th) 58
- 23 21 or 22 1335
- 24 exp animals/ not humans.sh. 5230386
- 25 ((animal model\* or mouse or mice or murine\* or rat or rats or rodent\* or muridae or murids or rabbit\* or leporine\* or leporidae or guineapig\* or cavies or caviidae or hamster\* or cricetidae or gerbil\* or gerbillinae or cat or cats or feline\* or felidae or dog or dogs or canine\* or canidae or pig or pigs or piglet\* or minipig\* or swine\* or porcine\* or suidae or horse or horses or donkey or donkies or burros or asses or equine\* or equidae or sheep or lamb or lambs or ovine or ovidae or goat or goats or cow or cows or cattle or bovine\* or bovidae or primate\* or monkey or monkeys or macaque or macaques or marmoset or marmosets) not human\*).ti. 2474021
- 26 24 or 25 5641233
- 27 23 not 26 1326
- 28 (review not randomized controlled trial).pt. 3333282
- 29 ((systematic review or meta analysis) not randomized controlled trial).pt. 349813
- 30 27 not (28 or 29) 1175
- 31 Psychosocial Intervention/ 1169

|    |                                                                                                                                                                     |            |
|----|---------------------------------------------------------------------------------------------------------------------------------------------------------------------|------------|
| 32 | (psychosocial* or psycho-social*).tw,kf.                                                                                                                            | 134314     |
| 33 | exp Psychotherapy/                                                                                                                                                  | 224250     |
| 34 | (psychotherap* or psycho-therap*).tw,kf.                                                                                                                            | 56450      |
| 35 | (psychological adj3 (therap* or train* or treat* or trial* or intervention*).tw,kf.                                                                                 | 26785      |
| 36 | ((behavi* or cognitive) adj3 (therap* or train* or treat* or trial* or intervention*)) or CBT*).tw,kf.                                                              | 120326     |
| 37 | behavi* activation.tw,kf.                                                                                                                                           | 2671       |
| 38 | exp Biofeedback, Psychology/                                                                                                                                        | 13356      |
| 39 | (biofeedback or bio-feedback).tw,kf.                                                                                                                                | 8721       |
| 40 | exp Counseling/                                                                                                                                                     | 49928      |
| 41 | counsel?ing.tw,kf.                                                                                                                                                  | 125062     |
| 42 | exp conditioning, psychological/ or avoidance learning/                                                                                                             | 75311      |
| 43 | (avoidance adj (activit* or learning or train*).tw,kf.                                                                                                              | 3273       |
| 44 | (avoid* adj3 (drug* or cannabi* or marihuana or marijuana or bhang or ganja or ganjah or hashish)).tw,kf.                                                           | 4456       |
| 45 | *Motivation/                                                                                                                                                        | 34045      |
| 46 | directive counseling/ or motivational interviewing/                                                                                                                 | 5106       |
| 47 | (motivation* adj3 (interview* or enhanc* or therap* or treat* or trial* or intervention*).tw,kf.                                                                    | 12587      |
| 48 | (behavio* adj3 (chang* or modif*).tw,kf.                                                                                                                            | 103651     |
| 49 | Mindfulness/                                                                                                                                                        | 6987       |
| 50 | (mindful?ness* or (mind adj3 train*).tw,kf.                                                                                                                         | 14844      |
| 51 | exp reinforcement, psychology/ or exp reward/                                                                                                                       | 63218      |
| 52 | (contingen* adj (manag* or reinforc*).tw,kf.                                                                                                                        | 1704       |
| 53 | community reinforcement*.tw,kf.                                                                                                                                     | 232        |
| 54 | exp Psychotherapy, Group/                                                                                                                                           | 28023      |
| 55 | ((family or families or social) adj3 (support* or therap* or intervention*).tw,kf.                                                                                  | 115303     |
| 56 | (adaptive adj3 (treatment* or intervention*).tw,kf.                                                                                                                 | 2175       |
| 57 | ((monetary or voucher* or prize*) adj5 (incentiv* or contingen* or reinforc* or reward* or treat* or trial* or intervention*).tw,kf.                                | 4682       |
| 58 | (vouchers or prizes or rewards).tw,kf.                                                                                                                              | 18571      |
| 59 | (incentive* or reward* or reinforcement* or motivation* or contingent*).ti,kf.                                                                                      | 74896      |
| 60 | (brief adj3 (therap* or train* or treat* or trial* or intervention*).tw,kf.                                                                                         | 17031      |
| 61 | Marijuana Abuse/th or Marijuana Smoking/th                                                                                                                          | 566        |
| 62 | Substance Withdrawal Syndrome/th                                                                                                                                    | 1009       |
| 63 | intervention.ti. or ((cannabi* or marihuana or marijuana or bhang or ganja or ganjah or hashish or addict* or depend* or use* disorder*) adj5 intervention*).ab,kf. | 133190     |
| 64 | or/31-63                                                                                                                                                            | 1051049    |
| 65 | 30 and 64                                                                                                                                                           | <u>582</u> |

**Ovid APA PsycInfo <1806 to June Week 1 2024>**

|   |                                                                                                                                                                                                                                                         |      |
|---|---------------------------------------------------------------------------------------------------------------------------------------------------------------------------------------------------------------------------------------------------------|------|
| 1 | "cannabis use"/                                                                                                                                                                                                                                         | 3527 |
| 2 | "cannabis use disorder"/                                                                                                                                                                                                                                | 882  |
| 3 | (exp Cannabis/ or "Cannabis Use"/) and (Drug Abuse/ or Drug Dependency/ or "Substance Use Disorder"/)                                                                                                                                                   | 3761 |
| 4 | ((cannabi* or marihuana or marijuana or bhang or ganja or ganjah or hashish) adj3 (problem* use* or overus* or abus* or misus* or dependen* or addict* or use* disorder* or overdos or craving* or cessation* or detox* or withdraw* or abstin*).tw,id. | 5025 |

- 5 ((cannabi\* or marihuana or marijuana or bhang or ganja or ganjah or hashish) adj3 (high\* or heavy or freq\*) adj3 (use\* or overuse\* or risk\* or smok\*)).tw,id. 2820
- 6 (CUD and (cannabi\* or marihuana or marijuana or bhang or ganja or ganjah or hashish)).tw,id. 541
- 7 (((substance adj2 disorder\*) or substance use\* treatment\*) and (cannabi\* or marihuana or marijuana or bhang or ganja or ganjah or hashish)).ti,id,hw.1307
- 8 (((relaps\* adj1 prevent\*) or maintenance) adj5 (cannabi\* or marihuana or marijuana or bhang or ganja or ganjah or hashish)).tw,id. 94
- 9 or/1-8 11712
- 10 randomized controlled trials/ 1077
- 11 (randomi#ed or randomi#ation or randomi#ing).tw,id. 116232
- 12 (RCT or "at random" or (random\* adj3 (administ\* or allocat\* or assign\* or class\* or cluster or crossover or cross-over or control\* or determine\* or divide\* or division or distribut\* or expose\* or fashion or number\* or place\* or pragmatic or quasi or recruit\* or split or substitut\* or treat\*))).tw,id. 135759
- 13 randomly.ab. 86984
- 14 ((single or double or triple or treble) adj2 (blind\* or mask\* or dummy)).tw,id. 30071
- 15 trial.ti. 40759
- 16 (placebo and control\* and trial).ab,id. 8886
- 17 (placebo adj5 (control\* or group\*)).tw,id. 23667
- 18 or/10-17 224211
- 19 9 and 18 1010
- 20 ((allocat\* or assign\*) and (group\* or control\*)).tw,id. and ((cannabis or marijuana) and (abuse or dependency or "substance use disorder" or "substance use treatment")).hw. 85
- 21 19 or 20 1036
- 22 ((animal model\* or mouse or mice or murine\* or rat or rats or rodent\* or muridae or murids or rabbit\* or leporine\* or leporidae or guineapig\* or cavies or caviidae or hamster\* or cricetidae or gerbil\* or gerbillinae or cat or cats or feline\* or felidae or dog or dogs or canine\* or canidae or pig or pigs or piglet\* or minipig\* or swine\* or porcine\* or suidae or horse or horses or donkey or donkies or burros or asses or equine\* or equidae or sheep or lamb or lambs or ovine or ovidae or goat or goats or cow or cows or cattle or bovine\* or bovidae or primate\* or monkey or monkeys or macaque or macaques or marmoset or marmosets) not human\*).ti. 182084
- 23 21 not 22 1033
- 24 (("literature review" or "systematic review" or meta analysis) not (clinical trial or empirical study or quantitative study or followup study)).md. 222299
- 25 23 and 24 69
- 26 23 not 25 964
- 27 exp psychosocial interventions/ 2210
- 28 (psychosocial\* or psycho-social\*).mp. 140248
- 29 exp psychotherapy/ 227225
- 30 (psychotherap\* or psycho-therap\*).mp. 219754
- 31 (psychological adj3 (therap\* or train\* or treat\* or trial\* or intervention\*)).mp. 31119
- 32 exp behavior therapy/ 114739
- 33 (((behavi\* or cognitive) adj3 (therap\* or train\* or treat\* or trial\* or intervention\*)) or CBT\*).mp. 151003
- 34 behavi\* activation.mp.3552
- 35 exp biofeedback/ 6983
- 36 (biofeedback or bio-feedback).mp. 7732
- 37 exp counseling/ 85712
- 38 counsel?ing.mp. 119036
- 39 exp operant conditioning/ 37838

|    |                                                                                                                                                                 |         |
|----|-----------------------------------------------------------------------------------------------------------------------------------------------------------------|---------|
| 40 | (avoidance adj (activit* or learning or train*)).mp.                                                                                                            | 14356   |
| 41 | (avoid* adj3 (drug* or cannabi* or marihuana or marijuana or bhang or ganja or ganjah or hashish)).mp.                                                          | 787     |
| 42 | motivation/                                                                                                                                                     | 65514   |
| 43 | motivational interviewing/                                                                                                                                      | 3214    |
| 44 | (motivation* adj3 (interview* or enhanc* or therap* or treat* or trial* or intervention*)).mp.                                                                  | 13265   |
| 45 | exp behavior modification/                                                                                                                                      | 27653   |
| 46 | exp behavior change/                                                                                                                                            | 16564   |
| 47 | (behavio* adj3 (chang* or modif*)).mp.                                                                                                                          | 83572   |
| 48 | readiness to change/                                                                                                                                            | 1878    |
| 49 | mindfulness/                                                                                                                                                    | 13493   |
| 50 | (mindful?ness* or (mind adj3 train*)).mp.                                                                                                                       | 22867   |
| 51 | exp reinforcement/                                                                                                                                              | 59486   |
| 52 | exp rewards/                                                                                                                                                    | 21330   |
| 53 | exp contingency management/                                                                                                                                     | 3480    |
| 54 | (contingen* adj (manag* or reinforc*)).mp.                                                                                                                      | 4145    |
| 55 | community reinforcement*.tw,id.                                                                                                                                 | 380     |
| 56 | Family Therapy/ or Family Intervention/                                                                                                                         | 27274   |
| 57 | social support/                                                                                                                                                 | 46216   |
| 58 | ((family or families or social) adj3 (support* or therap* or intervention*)).mp.                                                                                | 183539  |
| 59 | (adaptive adj3 (treatment* or intervention*)).mp.                                                                                                               | 846     |
| 60 | ((monetary or voucher* or prize*) adj5 (incentiv* or contingen* or reinforc* or reward* or treat* or trial* or intervention*)).mp.                              | 6636    |
| 61 | (vouchers or prizes or rewards).mp.                                                                                                                             | 36528   |
| 62 | (incentive* or reward* or reinforcement* or motivation* or contingent*).ti,id.                                                                                  | 126718  |
| 63 | brief interventions/                                                                                                                                            | 458     |
| 64 | (brief adj3 (therap* or train* or treat* or trial* or intervention*)).mp.                                                                                       | 16812   |
| 65 | exp "substance use treatment"/ or addiction treatment/                                                                                                          | 34900   |
| 66 | exp Intervention/                                                                                                                                               | 148956  |
| 67 | intervention.ti. or ((cannabi* or marihuana or marijuana or bhang or ganja or ganjah or hashish or addict* or depend* or use* disorder*) adj5 intervention).mp. | 63036   |
| 68 | or/27-67                                                                                                                                                        | 1169243 |
| 69 | 26 and 68                                                                                                                                                       | 507     |

**Central Register of Controlled Trials (CENTRAL) on the Cochrane Library** (Issue 6, 2024; searched 12-June-2024)

| ID | Search Hits                                                                                                                                                                                                                                                                     |
|----|---------------------------------------------------------------------------------------------------------------------------------------------------------------------------------------------------------------------------------------------------------------------------------|
| #1 | MeSH descriptor: [Marijuana Abuse] this term only 849                                                                                                                                                                                                                           |
| #2 | MeSH descriptor: [Marijuana Smoking] this term only and with qualifier(s): [drug therapy - DT, therapy - TH] 51                                                                                                                                                                 |
| #3 | ((cannabi* or marihuana or marijuana or bhang or ganja or ganjah or hashish) NEAR/3 ((problem* NEXT use*) or overus* or abus* or misus* or dependen* or addict* or (use* NEXT disorder*) or overdos or craving* or cessation* or detox* or withdraw* or abstin*)):ti,ab,kw 1604 |
| #4 | ((cannabi* or marihuana or marijuana or bhang or ganja or ganjah or hashish) NEAR/3 (high* or heavy or freq*) NEAR/3 (use* or overuse* or risk* or smok*)):ti,ab,kw 403                                                                                                         |
| #5 | (CUD and (cannabi* or marihuana or marijuana or bhang or ganja or ganjah or hashish)):ti,ab,kw 167                                                                                                                                                                              |

- #6 ((substance NEAR/2 disorder\*) and (cannabi\* or marihuana or marijuana or bhang or ganja or ganjah or hashish)):ti,ab,kw 945
- #7 (((relaps\* NEAR/2 prevent\*) or maintenance) NEAR (cannabi\* or marihuana or marijuana or bhang or ganja or ganjah or hashish)):ti,ab,kw 46
- #8 #1 or #2 or #3 or #4 or #5 or #6 or #7 2346
- #9 (psychosocial\* or psycho-social\*):ti,ab,kw 22061
- #10 MeSH descriptor: [Psychotherapy] explode all trees 35556
- #11 (psychotherap\* or psycho-therap\*):ti,ab,kw 17762
- #12 (psychological NEAR (therap\* or train\* or treat\* or trial\* or intervention\*)):ti,ab,kw 21766
- #13 (((behavi\* or cognitive) NEAR (therap\* or train\* or treat\* or trial\* or intervention\*)) or CBT\*):ti,ab,kw 93878
- #14 (behavi\* NEXT activation):ti,ab,kw 1405
- #15 MeSH descriptor: [Biofeedback, Psychology] explode all trees 2172
- #16 (biofeedback or bio-feedback):ti,ab,kw 4551
- #17 MeSH descriptor: [Counseling] explode all trees 7565
- #18 (counseling or counselling):ti,ab,kw 27992
- #19 MeSH descriptor: [Conditioning, Psychological] explode all trees 1325
- #20 MeSH descriptor: [Avoidance Learning] this term only 381
- #21 avoidance:ti,ab,kw 8299
- #22 (avoid\* NEAR (drug\* or cannabi\* or marihuana or marijuana or bhang or ganja or ganjah or hashish)):ti,ab,kw 894
- #23 MeSH descriptor: [Motivation] explode all trees 12337
- #24 MeSH descriptor: [Motivational Interviewing] this term only 1354
- #25 MeSH descriptor: [Directive Counseling] this term only 472
- #26 (motivation\* NEAR (interview\* or enhanc\* or therap\* or treat\* or trial\* or intervention\*)):ti,ab,kw 11475
- #27 (behavio\* NEAR (chang\* or modif\*)):ti,ab,kw 23055
- #28 MeSH descriptor: [Mindfulness] explode all trees 2314
- #29 (mindfulness\* or mindfullness\* or (mind NEAR train\*)):ti,ab,kw 10050
- #30 MeSH descriptor: [Reinforcement, Psychology] explode all trees 3079
- #31 MeSH descriptor: [Reward] explode all trees 1490
- #32 (contingen\* NEXT (manag\* or reinforc\*)):ti,ab,kw 1088
- #33 community reinforcement\*:ti,ab,kw 573
- #34 ((family or families or social) NEAR (support\* or therap\* or intervention\*)):ti,ab,kw 31868
- #35 (adaptive AND (treatment\* or intervention\*)):ti,ab,kw 8137
- #36 ((monetary or voucher\* or prize\*) AND (incentiv\* or contingen\* or reinforc\* or reward\* or treat\* or trial\* or intervention\*)):ti,ab,kw 3419
- #37 (vouchers or prizes or rewards):ti,ab,kw 2599
- #38 (incentiv\* or reward\* or reinforce\* or motivat\* or contingent\*):ti,kw 21427
- #39 (brief NEAR (therap\* or train\* or treat\* or trial\* or intervention\*)):ti,ab,kw 12911
- #40 MeSH descriptor: [Marijuana Abuse] explode all trees and with qualifier(s): [therapy - TH] 160
- #41 MeSH descriptor: [Marijuana Smoking] explode all trees and with qualifier(s): [therapy - TH] 31
- #42 MeSH descriptor: [Substance Withdrawal Syndrome] explode all trees and with qualifier(s): [therapy - TH] 120
- #43 intervention\*:ti85301
- #44 ((cannabi\* or marihuana or marijuana or bhang or ganja or ganjah or hashish or addict\* or depend\* or use\* disorder\*) NEAR intervention\*):ti,ab,kw 42639

#45 #9 OR #10 OR #11 OR #12 OR #13 OR #14 OR #15 OR #16 OR #17 OR #18 OR #19 OR  
 #20 OR #21 OR #22 OR #23 OR #24 OR #25 OR #26 OR #27 OR #28 OR #29 OR #30 OR #31 OR  
 #32 OR #33 OR #34 OR #35 OR #36 OR #37 OR #38 OR #39 OR #40 OR #41 OR #42 OR #43 OR  
 #44 289344  
 #46 #8 AND #45 1412  
 [Trials, n=1397]  
 #47 #8 NOT #46 934  
 [Trials, n=931]

### Economic search strategies

#### Ovid MEDLINE(R) ALL <1946 to July 30, 2024>

1 Marijuana Abuse/ 7240  
 2 Marijuana Smoking/dt, th 100  
 3 ((cannabi\* or marihuana or marijuana or bhang or ganja or ganjah or hashish) adj3  
 (problem\* use\* or overus\* or abus\* or misus\* or dependen\* or addict\* or use\* disorder\* or  
 overdos or craving\* or cessation\* or detox\* or withdraw\* or abstin\*)).tw,kf. 6284  
 4 ((cannabi\* or marihuana or marijuana or bhang or ganja or ganjah or hashish) adj3 (high\*  
 or heavy or freq\*) adj3 (use\* or overuse\* or risk\* or smok\*)).tw,kf. 3354  
 5 (CUD and (cannabi\* or marihuana or marijuana or bhang or ganja or ganjah or  
 hashish)).tw,kf.731  
 6 ((substance adj2 disorder\*) and (cannabi\* or marihuana or marijuana or bhang or ganja  
 or ganjah or hashish)).ti,kf,hw. 6936  
 7 (((relaps\* adj1 prevent\*) or maintenance) adj5 (cannabi\* or marihuana or marijuana or  
 bhang or ganja or ganjah or hashish)).tw,kf. 94  
 8 or/1-7 17367  
 9 Psychosocial Intervention/ 1194  
 10 (psychosocial\* or psycho-social\*).tw,kf. 135407  
 11 exp Psychotherapy/ 225117  
 12 (psychotherap\* or psycho-therap\*).tw,kf. 56765  
 13 (psychological adj3 (therap\* or train\* or treat\* or trial\* or intervention\*)).tw,kf.  
 27112  
 14 (((behavi\* or cognitive) adj3 (therap\* or train\* or treat\* or trial\* or intervention\*)) or  
 CBT\*).tw,kf. 121488  
 15 behavi\* activation.tw,kf. 2690  
 16 exp Biofeedback, Psychology/ 13410  
 17 (biofeedback or bio-feedback).tw,kf. 8797  
 18 exp Counseling/ 50061  
 19 counsel?ing.tw,kf. 126120  
 20 exp conditioning, psychological/ or avoidance learning/ 75393  
 21 (avoidance adj (activit\* or learning or train\*)).tw,kf. 3279  
 22 (avoid\* adj3 (drug\* or cannabi\* or marihuana or marijuana or bhang or ganja or ganjah  
 or hashish)).tw,kf. 4490  
 23 \*Motivation/ 34236  
 24 directive counseling/ or motivational interviewing/ 5132  
 25 (motivation\* adj3 (interview\* or enhanc\* or therap\* or treat\* or trial\* or  
 intervention\*)).tw,kf. 12690  
 26 (behavio\* adj3 (chang\* or modif\*)).tw,kf. 104473  
 27 Mindfulness/ 7102  
 28 (mindful?ness\* or (mind adj3 train\*)).tw,kf. 15099  
 29 exp reinforcement, psychology/ or exp reward/ 63424

- 30 (contingen\* adj (manag\* or reinforc\*)).tw,kf. 1716
- 31 community reinforcement\*.tw,kf. 234
- 32 exp Psychotherapy, Group/ 28087
- 33 ((family or families or social) adj3 (support\* or therap\* or intervention\*)).tw,kf.  
116550
- 34 (adaptive adj3 (treatment\* or intervention\*)).tw,kf. 2204
- 35 ((monetary or voucher\* or prize\*) adj5 (incentiv\* or contingen\* or reinforc\* or reward\* or  
treat\* or trial\* or intervention\*)).tw,kf. 4727
- 36 (vouchers or prizes or rewards).tw,kf. 18741
- 37 (incentive\* or reward\* or reinforcement\* or motivation\* or contingent\*).ti,kf. 75596
- 38 (brief adj3 (therap\* or train\* or treat\* or trial\* or intervention\*)).tw,kf. 17138
- 39 Marijuana Abuse/th or Marijuana Smoking/th 568
- 40 Substance Withdrawal Syndrome/th 1009
- 41 intervention.ti. or ((cannabi\* or marihuana or marijuana or bhang or ganja or ganjah or  
hashish or addict\* or depend\* or use\* disorder\*) adj5 intervention\*).ab,kf. 134558
- 42 ((acceptance adj2 commitment therap\*) or dialectical behavio\* therap\*).mp.  
3410
- 43 (psychoeducat\* or psycho-educat\* or problem sol\*).mp. 53845
- 44 or/9-43 1097376
- 45 8 and 44 3035
- 46 \*Economics/ 10816
- 47 Value of life/ 5828
- 48 exp "costs and cost analysis"/ 272007
- 49 exp economics, medical/ 14440
- 50 exp "fees and charges"/ 31482
- 51 exp budgets/ 14234
- 52 budget\*.tw,kf. 38439
- 53 intervention costs.tw,kf. 931
- 54 (cost? per adj2 (adolescent or adult or man or woman or male or female)).tw,kf. 214
- 55 economic\*.ti. 62835
- 56 (cost\* adj2 (effective\* or utilit\* or benefit\* or minimi\* or unit\* or estimat\* or  
variable\*)).tw,kf. 241478
- 57 (value adj2 (money or monetary)).tw,kf. 3243
- 58 or/46-57 550119
- 59 exp Health Care Costs/ 73393
- 60 "Cost of Illness"/ 32712
- 61 Health Expenditures/ 24890
- 62 (cost? adj2 (illness or disease or sickness or health care or healthcare or treatment or  
direct or indirect or medical or resource)).tw,kf. 94847
- 63 (burden? adj2 economic\*).tw,kf. 20068
- 64 (utili?ation adj2 (health or medical or resource)).tw,kf.38579
- 65 (out-of-pocket adj2 (payment? or expenditure? or cost? or spending or expense?)).tw,kf.  
7665
- 66 (expenditure? adj3 (health or direct or indirect)).tw,kf. 12207
- 67 (healthcare cost\* or health care cost\* or healthcare utili?ation or health care utili?ation  
or cost of illness).tw,kf. 57334
- 68 (cost\* adj2 (analy\* or outcome or outcomes)).tw,kf. 56842
- 69 or/59-68 277953
- 70 quality-adjusted life years/ 16622
- 71 qaly\*.tw,kf. 15700
- 72 quality adjusted life year\*.tw,kf. 18466

- 73 (eq-5d or eq5d or eq-5 or eq5 or euroqual or euro qual or euro qual5d or euroqual5d or euro qol or euroqol or euro qol5d or euroqol5d or euro quol or euroquol or euro quol5d or euroquol5d or eur qol or eurqol or eur qol5d or eur qol5d or eur?qul or eur?qul5d or euro\* quality of life or european qol).ti,ab,kf. 19310
- 74 (euro\* adj3 (5 d or 5d or 5 dimension\* or 5dimension\* or 5 domain\* or 5domain\*)).tw,kf. 6604
- 75 ((hql\* or hqol\* or h qol\* or hrqol\* or hr qol\* or quality of life) adj2 (increase\* or decrease\* or improv\* or declin\* or reduc\* or high\* or low\* or effect or effects or worse or score or scores or change? or impact? or impacted or deteriorate\*)).tw,kf. 130675
- 76 \*"quality of life"/ and economics.fs. 2946
- 77 "quality of life"/ and ((quality or qol) adj3 (improv\* or chang\*)).tw,kf. 46773
- 78 (health utility\* or utility score\* or disutilit\*).tw,kf. 4071
- 79 (utilities or (utilit\$ adj3 (score? or value\* or health\* or cost\* or analys\* or measur\* or disease\* or mean or gain or gains or index or indices))).tw,kf. 32289
- 80 (hui or hui1 or hui-1 or hui2 or hui-2 or hui3 or hui-3).tw,kf. 2121
- 81 health\* year\* equivalent\*.tw,kf. 40
- 82 (willingness to pay or time tradeoff or time trade off or tto or standard gamble\*).tw,kf. 12543
- 83 (sf36\* or sf-36\* or sf 36 or sf6 or sf 6 or sf-6 or sf6d or sf 6d or sf-6d or sf8 or sf-8 or sf 8 or sf12 or sf-12 or sf 12 or sf16 or sf-16 or sf 16 or sf20 or sf-20 or sf 20 or sf thirtysix or sf thirty six).tw,kf. 38549
- 84 (visual analog\* scale\* or EQ-VAS).tw,kf. 80643
- 85 or/70-84 309052
- 86 exp models, economic/ 16429
- 87 (markov\* or monte carlo).tw,kf. 92313
- 88 econom\* model\*.tw,kf. 6332
- 89 ((value adj2 information analysis) or (expected value adj3 perfect information) or (expected value adj3 sampl\* information)).tw,kf. 484
- 90 (microsimulation? or micro-simulation?).tw,kf. 2331
- 91 discrete event? simulation?.tw,kf. 1056
- 92 discrete choice experiment\*.tw,kf. 3252
- 93 or/86-92 116560
- 94 45 and 58 71
- 95 45 and 69 45
- 96 45 and 85 34
- 97 45 and 93 3
- 98 94 or 95 or 96 or 97 114

**Ovid Embase <1974 to 2024 July 30>**

- 1 cannabis addiction/ 12284
- 2 \*cannabis smoking/ 1662
- 3 ((cannabi\* or marihuana or marijuana or bhang or ganja or ganjah or hashish) adj3 (problem\* use\* or overus\* or abus\* or misus\* or dependen\* or addict\* or use\* disorder\* or overdos or craving\* or cessation\* or detox\* or withdraw\* or abstin\*)).tw,kf. 8928
- 4 ((cannabi\* or marihuana or marijuana or bhang or ganja or ganjah or hashish) adj3 (high\* or heavy or freq\*) adj3 (use\* or overuse\* or risk\* or smok\*)).tw,kf. 4478
- 5 (CUD and (cannabi\* or marihuana or marijuana or bhang or ganja or ganjah or hashish)).tw,kf.996
- 6 ((substance adj2 disorder\*) and (cannabi\* or marihuana or marijuana or bhang or ganja or ganjah or hashish)).ti,kf,hw. 2700



7 ((relaps\* adj1 prevent\*) or maintenance) adj5 (cannabi\* or marihuana or marijuana or  
 bhang or ganja or ganjah or hashish)).tw,kf. 118

8 or/1-7 22326

9 psychosocial intervention/ 2818

10 (psychosocial\* or psycho-social\*).tw,kf. 185802

11 exp psychotherapy/ 311693

12 (psychotherap\* or psycho-therap\*).tw,kf. 74720

13 (psychological adj3 (therap\* or train\* or treat\* or trial\* or intervention\*)).tw,kf.  
 37940

14 (((behavi\* or cognitive) adj3 (therap\* or train\* or treat\* or trial\* or intervention\*)) or  
 CBT\*).tw,kf. 166615

15 behavi\* activation.tw,kf. 3309

16 exp biofeedback/ 8865

17 (biofeedback or bio-feedback).tw,kf. 13164

18 exp counseling/ 212280

19 counsel?ing.tw,kf. 184901

20 exp "conditioning (psychology)"/ 2738

21 exp avoidance behavior/ 48060

22 (avoidance adj (activit\* or learning or train\*)).tw,kf. 3254

23 (avoid\* adj3 (drug\* or cannabi\* or marihuana or marijuana or bhang or ganja or ganjah  
 or hashish)).tw,kf. 6854

24 \*motivation/ or incentive/ 38121

25 motivational interviewing/ 7538

26 (motivation\* adj3 (interview\* or enhanc\* or therap\* or treat\* or trial\* or  
 intervention\*)).tw,kf. 17437

27 (behavio\* adj3 (chang\* or modif\*)).tw,kf. 129981

28 mindfulness/ or mindfulness meditation/ or mindfulness-based stress reduction/ or  
 mindfulness-based cognitive therapy/ 18498

29 "reinforcement (psychology)"/ 5129

30 \*reward/ or monetary reward/ 15444

31 (contingen\* adj (manag\* or reinforc\*)).tw,kf. 2119

32 (contingence management or motivational enhancement therapy).dq. 240

33 community reinforcement\*.tw,kf. 291

34 group therapy/ or exp family therapy/ 35024

35 ((family or families or social) adj3 (support\* or therap\* or intervention\*)).tw,kf.  
 148553

36 (adaptive adj3 (treatment\* or intervention\*)).tw,kf. 3251

37 ((monetary or voucher\* or prize\*) adj5 (incentiv\* or contingen\* or reinforc\* or reward\* or  
 treat\* or trial\* or intervention\*)).tw,kf. 6122

38 voucher program/ 99

39 (vouchers or prizes or rewards).tw,kf. 21985

40 (incentive\* or reward\* or reinforcement\* or motivation\* or contingent\*).ti,kf. 85342

41 intervention.ti. or ((cannabi\* or marihuana or marijuana or bhang or ganja or ganjah or  
 hashish or addict\* or depend\* or use\* disorder\*) adj5 intervention\*).ab,kf. 179695

42 (mindful?ness\* or (mind adj3 train\*)).tw,kf. 18820

43 (brief adj3 (therap\* or train\* or treat\* or trial\* or intervention\*)).tw,kf. 22350

44 ((acceptance adj2 commitment therap\*) or dialectical behavio\* therap\*).mp.  
 5818

45 (psychoeducat\* or psycho-educat\* or problem sol\*).mp. 74380

46 or/9-45 1417561

47 8 and 46 4241

48 \*economics/ 27998  
 49 health economics/ 36699  
 50 exp economic evaluation/ 372502  
 51 "cost"/ 64837  
 52 exp fee/ 45491  
 53 budget/ 35031  
 54 \*finance/ 4149  
 55 budget\*.tw,kf. 50829  
 56 intervention costs.tw,kf. 1149  
 57 (cost? per adj2 (adolescent or adult or man or woman or male or female)).tw,kf. 271  
 58 (cost\* adj2 (effective\* or utilit\* or benefit\* or minimi\* or unit\* or estimat\* or  
 variable\*).tw,kf. 329813  
 59 economic\*.ti. 77271  
 60 (value adj2 (money or monetary)).tw,kf. 4375  
 61 or/48-60 765125  
 62 \*"health care cost"/ or health care financing/ 64373  
 63 "cost of illness"/ 21924  
 64 "cost benefit analysis"/ 97705  
 65 (cost? adj2 (illness or disease or sickness or health care or healthcare or treatment or  
 direct or indirect or medical or resource)).tw,kf. 150863  
 66 (burden? adj2 economic\*).tw,kf. 32092  
 67 (utili#ation adj2 (health or medical or resource)).tw,kf. 59923  
 68 (out-of-pocket adj2 (payment? or expenditure? or cost? or spending or expense?)).tw,kf.  
 10930  
 69 (expenditure? adj3 (health or direct or indirect)).tw,kf. 16027  
 70 (healthcare cost\* or health care cost\* or healthcare utili?ation or health care utili?ation  
 or cost of illness).tw,kf. 90958  
 71 (cost\* adj2 (analy\* or outcome or outcomes)).tw,kf. 88109  
 72 or/62-71 420490  
 73 quality adjusted life year/ 38132  
 74 (quality adjusted life year? or qaly\* or qald\* or qale\* or qtime\*).tw,kf. 35637  
 75 (eq-5d or eq5d or eq-5 or eq5 or euroqual or euro qual or euro qual5d or euroqual5d or  
 euro qol or euroqol or euro qol5d or euroqol5d or euro quol or euroquol or euro quol5d or  
 euroquol5d or eur qol or eurqol or eur qol5d or eur qol5d or eur?qul or eur?qul5d or euro\*  
 quality of life or european qol).tw,kf. 34287  
 76 (euro\* adj3 (5 d or 5d or 5 dimension\* or 5dimension\* or 5 domain\* or 5domain\*)).tw,kf.  
 9836  
 77 ((hql\* or hqol\* or h qol\* or hrqol\* or hr qol\*) adj2 (increase\* or decrease\* or improv\* or  
 declin\* or reduc\* or high\* or low\* or effect or effects or worse or score or scores or change? or  
 impact? or impacted or deteriorate\*)).tw,kf. 20421  
 78 "quality of life"/ and economics/ 3589  
 79 (multiattribute\* or multi attribute\*).tw,kf. 1698  
 80 health utilit\*.tw,kf. 4970  
 81 (utilit\* adj2 (value\* or cost\* or health or analys\* or index or indices)).tw,kf. 25861  
 82 disutilit\$.tw,kf. 1385  
 83 (hsuv or hsuvs).tw,kf. 226  
 84 (health? year? equivalent? or hye?).tw,kf. 274  
 85 (hui or hui1 or hui2 or hui3 or hui-1 or hui-2 or hui-3).tw,kf. 3408  
 86 (hye or hyes).tw,kf. 200  
 87 rosser.tw,kf. 147  
 88 exp short form 36/ and (QoL or "quality of life").mp. 39025

|     |                                                                                                                                                                                                                                                               |        |
|-----|---------------------------------------------------------------------------------------------------------------------------------------------------------------------------------------------------------------------------------------------------------------|--------|
| 89  | (sf36\$ or sf-36\$ or sf 36 or sf6 or sf 6 or sf-6 or sf6d or sf 6d or sf-6d or sf8 or sf-8 or sf 8 or sf12 or sf-12 or sf 12 or sf16 or sf-16 or sf 16 or sf20 or sf-20 or sf 20 or sf thirtysix or sf thirty six).tw,kf. and (QoL or "quality of life").mp. | 45288  |
| 90  | (15d or 15-d or 15 dimension).tw,kf.                                                                                                                                                                                                                          | 8032   |
| 91  | standard gamble/ or time trade-off method/ or willingness to pay/                                                                                                                                                                                             | 5216   |
| 92  | standard gamble*.tw,kf.                                                                                                                                                                                                                                       | 1242   |
| 93  | ("time trade off?" or time tradeoff? or tto or timetradeoff?).tw,kf.                                                                                                                                                                                          | 3770   |
| 94  | "willingness to pay".tw,kf.                                                                                                                                                                                                                                   | 14467  |
| 95  | EQ-VAS.tw,kf.                                                                                                                                                                                                                                                 | 2800   |
| 96  | or/73-95                                                                                                                                                                                                                                                      | 173814 |
| 97  | economic model/ or econometric model/                                                                                                                                                                                                                         | 4306   |
| 98  | monte carlo method/ or markov chain monte carlo method/                                                                                                                                                                                                       | 56196  |
| 99  | econom* model*.tw,kf.                                                                                                                                                                                                                                         | 8942   |
| 100 | (markov* or monte carlo).tw,kf.                                                                                                                                                                                                                               | 104593 |
| 101 | ((value adj2 information analysis) or (expected value adj3 perfect information) or (expected value adj3 sampl* information)).tw,kf.                                                                                                                           | 689    |
| 102 | (microsimulation? or micro-simulation?).tw,kf.                                                                                                                                                                                                                | 3548   |
| 103 | discrete event? simulation?.tw,kf.                                                                                                                                                                                                                            | 1611   |
| 104 | discrete choice experiment?.tw,kf.                                                                                                                                                                                                                            | 4724   |
| 105 | or/97-104                                                                                                                                                                                                                                                     | 135178 |
| 106 | 47 and 61                                                                                                                                                                                                                                                     | 107    |
| 107 | 47 and 72                                                                                                                                                                                                                                                     | 72     |
| 108 | 47 and 96                                                                                                                                                                                                                                                     | 23     |
| 109 | 47 and 105                                                                                                                                                                                                                                                    | 4      |
| 110 | or/106-109                                                                                                                                                                                                                                                    | 152    |
